# Supplementary material for: Understanding Therapeutic Inertia in the Management of Hypertension in Primary Care: Examining Contributing Factors at the Patient and Provider Levels in Chittoor District, Andhra Pradesh, India – A Mixed Methods Study
Source: Research Square preprint supplement (doi:10.21203/rs.3.rs-8418875/v1), 2026-01-25
Supplement: Supplementary file 1 [file 54b73b5321249d95d170fe69.docx]

**Supplementary file 2**

**Thematic guide for In-depth interview**

**Healthcare providers**

Thank you for agreeing to participate in the study.

I am conducting a study on understanding therapeutic inertia which refers to the failure to intensify treatment or add new medications for managing hypertension in primary care, examining the contributing factors at both patient and provider level. I am currently investigating the barriers to therapeutic inertia at the provider’s level as well as explore the shared decision-making process and your views on incorporating patient preferences in the management of uncontrolled hypertension among patients attending the public health facilities.

Obtain informed consent and ensure confidentiality.

| - 1. Main question | Can you tell me a little about yourself? |
| --- | --- |
| Probes | Family background, Professional background, education, etc. |
| - 1. Main question | Can you tell me your role as a medical officer in this facility? How long have you been working in primary healthcare and this facility in particular? |
| - 1. Main question | What are the major health conditions you manage in your facility? |
| Stimulus question | How much would be the burden of hypertension in your facility when compared to other health conditions? |
|  | How do you typically approach the treatment decisions for patients with high blood pressure at your facility? |
| Probes | Access to sufficient medications, diagnostic tools, a registry of patients with hypertension, and a follow-up mechanism for managing patients with hypertension |
| - 1. Main question | How familiar are you with the current guidelines on managing hypertension? Are there any areas where you feel specific training is required to improve the management of hypertension? |
| Stimulus question | In your experience, have you faced any challenges in following these guidelines with the reality of managing hypertensive patients, especially in the practical setting of a healthcare facility? |
| - 1. Main question | When is the typical scenario when the BP is uncontrolled? |
| Stimulus question | When managing a hypertensive patient whose BP is uncontrolled, how do you decide whether to continue the current treatment, recommend lifestyle modification or intensify the treatment? |
|  | What factors do you consider before making changes to a patient’s treatment plan? |
| - 1. Main question | Have there been instances where you have waited for subsequent BP readings before intensifying treatment and asked patients to return for follow-up? |
| Stimulus questions | In which circumstances do you prefer this approach over immediate treatment intensification? |
| - 1. Main question | When a patient’s blood pressure is close to the target but not yet within the range, what action do you take? Do you intensify the treatment in such cases? |
| Stimulus question | What factors influence your decision to wait or not intensify treatment when the blood pressure is borderline? |
| - 1. Main question | How often do you prioritise optimising lifestyle changes before intensifying treatment or adding a new medication? What challenges do you face in making them adopt the recommended lifestyle modification? |
| Stimulus questions | When lifestyle modifications are not enough, how do you decide when to initiate or intensify treatment? |
| - 1. Main question | Does the presence of any other co-morbidities affect the treatment intensification? |
| Stimulus question | Do you consider the impact of other medications the patient is currently taking before adjusting the treatment? |
| - 1. Main question | What are the key challenges you face in ensuring patients adhere to treatment especially when treatment intensification is required? |
|  | Has there been any instances where you have not intensified the treatment due to potential side effects? |
|  | Is the treatment burden, i.e. too many medications, a specific reason for non-adherence? Do you consider fixed-dose combination as a part of your approach to simplify the treatment process or how else do you address this? |
| - 1. Main question | Do patients ever hesitate to follow the treatment when treatment intensification has been recommended? |
| Stimulus questions | What challenges do you face in convincing patients to accept the treatment changes? |
| - 1. Main question | Do time constraints during consultations limit your ability to discuss treatment options or goals with patients? |
| - 1. Main question | How often do you involve patients in developing the treatment plan? |
| Stimulus question | What makes it difficult to engage patients in discussions about treatment intensification or lifestyle changes? |
| - 1. Main question | What do you think would help you initiate treatment changes more effectively in patients with uncontrolled hypertension? |
| Stimulus questions | How could shared decision-making be improved in your consultations? |
|  | Are there any changes within the system, training or external support that could make this process easier? |

Summarise, ask if they want to share anything else.

Thank the participant with warmth.

**Thematic guide for In-depth interview**

**Patients with uncontrolled hypertension**

Thank you for agreeing to participate in the study.

We are exploring factors that influence treatment decisions for managing hypertension at the patient’s level and your experience with those decisions. Your insights will help us understand the major factors how patients perceive their hypertension management and what influences the treatment decisions along with how they engage in their care.

Obtain informed consent and ensure confidentiality.

| 1. Main question | Can you tell me a little about yourself? |
| --- | --- |
| Probes | Family background, professional background, education status, etc. |
| Stimulus questions | Could you describe your daily routine? |
|  | Who do you live with at home currently? Do they support you with your health? |
|  | Does anyone in your family has high blood pressure other than you? |
| 1. Main question | What do you understand about hypertension and its risks? |
| Stimulus questions | Do you know why it is important to control blood pressure? |
|  | Were you informed about the ideal blood pressure range for you? |
| 1. Main question | How long have you been coming to this facility for your hypertension treatment? How often do you come to visit the facility either for follow-up or medication refill? |
| Stimulus questions | What has your experience been like when visiting the facility? Are there things you like or find challenging? |
| 1. Main question | When were you first diagnosed with hypertension? Were you started on medications immediately or were other options suggested for you? |
| 1. Main question | Have you made any lifestyle changes since being diagnosed with hypertension? |
| Probes | E.g.: Changes in diet, exercise habits, walking |
| Stimulus question | Have you faced any difficulties in maintaining a healthy diet or regular walking/exercise? |
| 1. Main question | Do you feel taking medication is necessary for controlling your hypertension? |
| Stimulus questions | Have you ever been hesitant to follow the treatment suggested by your doctor? If yes, why? |
|  | Do you find it easy or difficult to take your medication regularly? Why? |
|  | Do you feel there is a need to take too many medicines to control your BP? Is that hindering you from adhering to the medication? |
|  | Have you ever stopped or skipped taking your medication? If so, why? |
|  | Do you have any concerns about the side effects of your medication? |
| 1. Main question | Are you able to access healthcare facilities and medicines easily? |
| Stimulus question | Have you ever felt that the cost of medications affects your ability to follow the treatment plan? |
| 1. Main question | How well do you feel your doctor explains the treatment options to you? Are you given chance to ask questions during the consultation? |
| Stimulus questions | Do you trust your doctor’s advice on treatment and management of hypertension? Has there been any instances where you have disagreed with your doctor’s advice? |
| 1. Main question | When your treatment was decided, were you involved in the decision, was it made after listening to your preferences and difficulties? |
| Stimulus question | Do you feel comfortable in sharing your preferences or concerns? Do you feel your preferences are respected during the consultation? |
| 1. Main question | What do you think would make it easier for you to follow your treatment plan? |
| Stimulus question | How could your doctor provide better support or involve you in the treatment process? |

Summarize, ask if they want to share anything else.

Thank the participant with warmth.
