# Supplementary material for: Understanding Therapeutic Inertia in the Management of Hypertension in Primary Care: Examining Contributing Factors at the Patient and Provider Levels in Chittoor District, Andhra Pradesh, India – A Mixed Methods Study
Source: Research Square preprint supplement (doi:10.21203/rs.3.rs-8418875/v1), 2026-01-25
Supplement: Supplementary file 2 [file 6e6fa242b16c86bdf7471064.docx]

**Supplementary file 1**

**Structured questionnaire to assess therapeutic inertia among patients with uncontrolled hypertension attending the healthcare facility**

| **S. No.** | **Questions** | **Coding categories** | **Answer code** |
| --- | --- | --- | --- |
| **PHYSICIAN DETAILS** | | | |
|  | Specify the type of facility visited | 1. FDP 104 Clinic 2. Primary Health Centre (PHC) 3. Urban Primary Health Centre (UPHC) 4. NCD clinic at CHC 5. Others (Specify) |  |
|  | Specify the facility location | (Record the location here🡪) |  |
|  | Age (of the medical officer in-charge in completed years) | (Record the number here 🡪) |  |
|  | Gender (record observation) | 1. Male 2. Female 3. Others (Specify) |  |
|  | Years of experience (as a government medical officer) | (Record the number here 🡪) |  |
|  | Training in hypertension management | 1. Yes 2. No |  |
| **If “No” skip to the next section** | | | |
|  | When was the last hypertension management training conducted? | 1. Last month 2. 3 months before 3. 6 months before 4. 1 year before 5. More than a year back |  |
| **PATIENT DETAILS** | | | |
| **SOCIODEMOGRAPHIC DETAILS** | | | |
|  | Name of the patient | (Record the name here 🡪) |  |
|  | Age (in completed years) | (Record the number here 🡪) |  |
|  | Gender (record observation) | 1. Male 2. Female 3. Others (Specify) |  |
|  | Occupation | 1. **Professional/ Skilled worker:** Doctors, teachers, engineers, government employees, bankers 2. **Semi-skilled**: Clerks, technicians, salespersons, drivers, cooks 3. **Unskilled:** Daily wage labourer, construction workers, housekeepers 4. **Self-employed/Business:** Shop owners, farmers, street vendors, small business owners 5. **Unemployed/Retired/Homemaker** (No active income) 6. Others (Specify) |  |
|  | Education qualification (If a person attended a few years of the middle school but did not complete it, select “primary school completed”) | 1. Post graduate or higher 2. Graduated degree 3. Intermediate or Diploma (12th grade) 4. High school certificate (10th Grade) 5. Middle school (8th Grade completed) 6. Primary school certificate (5th grade completed) 7. Illiterate |  |
| **ANTHROPOMETRIC DETAILS** | | | |
|  | Height (in cm) | (Record the number here 🡪) |  |
|  | Weight (in kg) | (Record the number here 🡪) |  |
|  | BMI (Calculated automatically through height and weight) | (Record the number here 🡪) |  |
| **CARDIOVASCULAR RISK FACTORS AND CO-MORBIDITIES** | | | |
|  | Is there a primary target organ damage? (Could be considered as a co-morbidity) | 1. Cerebrovascular disease (History of hemorrhagic or ischemic stroke) 2. Chronic renal failure/chronic kidney disease 3. Coronary heart disease (Angina, Myocardial infarction) 4. Left ventricular hypertrophy (LVH) 5. Peripheral artery disease (PAD) 6. Hypertensive retinopathy 7. None   8. Others (Specify) |  |
|  | Dyslipidemia (Cholesterol) treated with medication | Yes  No  Have not checked/Don’t know |  |
|  | Type 2 diabetes treated with medication | Yes  No |  |
|  | Smoking status | Never  Former  Current |  |
|  | Do you consume any other form of smokeless tobacco? | Yes  No |  |
|  | Alcohol consumption | Yes  No |  |
|  | Does your parents have heart problems or high blood pressure? (Early cardiovascular heredity in parents of 1st degree) | Yes  No  Don’t know |  |
| **DIETARY AND PHYSICAL ACTIVITY ASSESSMENT** | | | |
|  | On how many days per week do you usually eat fruits and or/vegetables? | 1. None 2. 1-2 days a week 3. 3-4 days a week 4. 5-6 days a week 5. Daily |  |
|  | On average, how many portions of fruits and vegetables do you eat per day? (One portion is a size of the fist or medium-sized bowl) | 1. None 2. 1-2 portions 3. 3-4 portions 4. 5 or more portions |  |
|  | Do you usually modify the amount of salt in your food, or do you eat the same amount as your family? | - 1. I eat the same food as my family, without reducing salt   2. I reduce the salt in my food separately   3. My family already cooks with less salt, so I don’t need to reduce it further   4. Others (Specify) |  |
|  | Do you add salt to your food at the table? | 1. Never 2. Rarely (Once a week or less) 3. Sometimes (2-3 times a week) 4. Often (4-6 times a week) 5. Always |  |
|  | How often do you take food high in sodium? (E.g.: Papad, Salty snacks/chips, Pickle?) | 1. Never 2. Rarely (Once a week or less) 3. Sometimes (2-3 times a week) 4. Often (4-6 times a week) 5. Daily |  |
|  | How often do you consume fried or high fat food? (Eg: Fast food, fried snacks etc) | 1. Never 2. Rarely (Once a week or less) 3. Sometimes (2-3 times a week) 4. Often (4-6 times a week) 5. Daily |  |
|  | In your daily routine, what kind of physical activity do you do? (For at least 10 minutes continuously) | 1. Vigorous physical activity (Farming, Lifting heavy loads, Construction work, etc.) 2. Moderate-intensity physical activity (Walking long distances, sweeping/mopping, washing clothes by hand, cattle grazing, etc.) 3. Light-intensity physical activity (Slow/casual walking inside home, small household chores such as cooking, dusting, etc.) 4. No physical activity |  |
|  | In a typical week, how many days do you engage in the particular physical activity? | (Record the number here🡪) |  |
|  | On a typical day, how much time do you spend in this activity at a stretch (without long breaks)? (in mins) | (Record the duration here🡪) |  |
|  | On average how many hours per day do you spend sitting or lying down (excluding sleep)? | 1. Less than 2 hours 2. 2-4 hours 3. 4-6 hours 4. 6-8 hours 5. More than 8 hours |  |
| **CONSULTATION DETAILS AND HYPERTENSION CARE** | | | |
|  | Date of consultation | (Record the date here 🡪) |  |
|  | Timing of the schedule | Morning (9:00 AM to 12:00 PM)  Afternoon (12:00 PM to 2:00 PM)  Evening (2:00 PM to 4:00 PM) |  |
|  | Duration of the consultation (in minutes) | <=5  6 –10  11 – 15  16 – 30  >30 |  |
| 4.1 | Systolic blood pressure during current consultation (mmHg) | (Record the S.B.P here 🡪) |  |
| 4.2 | Diastolic blood pressure during current consultation (mmHg) | (Record the D.B.P here 🡪) |  |
|  | For how long has the patient been hypertensive? (In years) | Less than 1  1-5  6-10  11-15  16-20  More than 20 |  |
|  | Where do you currently seek care for hypertension? | FDP 104 clinic  Public – SC  Public – PHC  Public – Secondary/tertiary (CHC/SDH/DH)  Private clinic  Don't know/Don't remember  Others (Specify) |  |
|  | Do you visit any other facility (apart from the one mentioned before) for treatment of hypertension? | Yes  No |  |
| **If “No” skip to 8** | | | |
| 7.1 | Where do you visit for your additional consultation? | FDP 104 clinic  Public – SC  Public – PHC  Public – Secondary/tertiary (CHC/SDH/DH)  Private clinic  Don't know/Don't remember  Others (Specify) |  |
| 7.2 | Why do you visit multiple facilities for hypertension treatment? | I do not get medicines regularly at the facility  I felt my BP is not well controlled and to seek other options  I was referred to other facility  I want to consult different doctors for opinion  I feel the medicines are not good enough  Others (Specify) |  |
|  | How often do you visit the government facility for your blood pressure check-up or follow-up? | Weekly/fortnightly  Monthly  Once in 2-3 months  Once in 4-6 months  Less than two times in a year  Don’t know / Don’t remember |  |

| **TREATMENT RELATED CHARACTERISTICS** |
| --- |

| 1. Specify the antihypertensive medications taken by the patient until now with the dose | How many tablets per day |
| --- | --- |
|  |  |
|  |  |
|  |  |
|  |  |
|  |  |
| 1. Total number of anti-hypertensive medication taken by the patient | (Record the number here 🡪) |

| 1. Specify the antihypertensive medications prescribed during the particular consultation with the dose | How many tablets per day |
| --- | --- |
|  |  |
|  |  |
|  |  |
|  |  |
|  |  |

|  | Decision on hypertensive treatment on the particular consultation (Cross check with medical record review if available) | | 1. Yes, the dose was increased 2. Yes, a new medication was added 3. No, the treatment remained the same. 4. Others (Specify) |  | |
| --- | --- | --- | --- | --- | --- |
|  | Who prescribed medicine in the current consultation? | | 1. Medical Officer 2. Staff nurse 3. MLHP (Mid-level health professional) 4. Others (Specify) |  | |
|  | At your last follow-up visit, was your blood pressure above the target level? (Cross check with medical record review if available) | | Yes  No  Record not available |  | |
| **If “No” and “Record not available” skip to 7** | | | | | |
| 6.1 | Systolic blood pressure during last consultation (mmHg) | | (Record the BP here 🡪) |  | |
| 6.2 | Diastolic blood pressure during last consultation (mmHg) | | (Record the BP here 🡪) |  | |
| 6.3 | At your last visit, did your doctor make any changes to your blood pressure medication? (Cross check with medical record review if available) | | 1. Yes, the doctor increased the dosage 2. Yes, a new medication was added. 3. No, the treatment remained the same 4. Others (Specify) |  | |
|  | Where do you generally obtain the medicines from? | | 1. Government facility (104 clinic/PHC/CHC/HWC) 2. Private pharmacy 3. Both government and private (depending on availability) 4. Others (Specify) |  | |
|  | | Today before coming to the healthcare facility, did you take your morning dose of medicine? | - - - 1. Yes       2. No |  |
|  | | In the last 30 days, how many days did you miss your drugs prescribed for your high blood pressure? | (Record the number here 🡪) |  |
|  | | Have you experienced any adverse effect or side effect due to medication? | Yes  No  Don’t remember |  |
|  | | Additional comments on treatment characteristics | (Record the comments here 🡪) |  |
| **SHARED DECISION MAKING (SDM-Q-9)** | | | | |
|  | | My doctor made it clear that a decision about my BP treatment needs to be made  *(Did your doctor clearly tell you that a decision about your BP treatment needed to be made?)* | Completely disagree  Strongly disagree  Somewhat disagree  Somewhat agree  Strongly agree  Completely agree |  |
|  | | My doctor helped me understand all the information about hypertension. | Completely disagree  Strongly disagree  Somewhat disagree  Somewhat agree  Strongly agree  Completely agree |  |
|  | | My doctor told me that there are different options for treating my medical condition *(Eg, Lifestyle changes, Different medicines, etc)* | Completely disagree  Strongly disagree  Somewhat disagree  Somewhat agree  Strongly agree  Completely agree |  |
|  | | My doctor precisely explained the advantages and disadvantages of the treatment options. *(Benefits and side-effects)* | Completely disagree  Strongly disagree  Somewhat disagree  Somewhat agree  Strongly agree  Completely agree |  |
|  | | My doctor wanted to know exactly how I want to be involved in deciding my BP treatment.  *(Did your doctor ask if you wanted to help decide how to manage your BP, or if you preferred them to decide for you)* | Completely disagree  Strongly disagree  Somewhat disagree  Somewhat agree  Strongly agree  Completely agree |  |
|  | | My doctor and I thoroughly weighed the different treatment options.  *(Did you and your doctor discuss the different BP treatment options together?)* | Completely disagree  Strongly disagree  Somewhat disagree  Somewhat agree  Strongly agree  Completely agree |  |
|  | | My doctor asked me which treatment option I prefer.  *(Fewer medicines, lifestyle changes first, etc)* | Completely disagree  Strongly disagree  Somewhat disagree  Somewhat agree  Strongly agree  Completely agree |  |
|  | | My doctor and I selected a treatment option together.  *(Did you and your doctor decide on the BP treatment plan together?)* | Completely disagree  Strongly disagree  Somewhat disagree  Somewhat agree  Strongly agree  Completely agree |  |
|  | | My doctor and I reached an agreement on how to proceed  *(Did you and your doctor agree on what should be done next to manage your BP?)* | Completely disagree  Strongly disagree  Somewhat disagree  Somewhat agree  Strongly agree  Completely agree |  |
