# Supplementary material for: Understanding Therapeutic Inertia in the Management of Hypertension in Primary Care: Examining Contributing Factors at the Patient and Provider Levels in Chittoor District, Andhra Pradesh, India – A Mixed Methods Study
Source: Research Square preprint supplement (doi:10.21203/rs.3.rs-8418875/v1), 2026-01-25
Supplement: Supplementary file 3 [file cd0d93bfd119816b5c152277.docx]

**Supplementary file 3**

**Characteristics of study participants involved in in-depth interviews**

**Table S1:** Characteristics of patients with uncontrolled hypertension (N=9)

| S. No. | Age range (years) | Gender | Time since diagnosis (years) |
| --- | --- | --- | --- |
| Patient 1 | 50-60 | Female | Less than 1 |
| Patient 2 | 70-80 | Male | More than 20 |
| Patient 3 | 60-70 | Male | 6-10 |
| Patient 4 | 50-60 | Female | 1-5 |
| Patient 5 | 60-70 | Female | 1-5 |
| Patient 6 | 60-70 | Male | 1-5 |
| Patient 7 | 50-60 | Female | Less than 1 |
| Patient 8 | 40-50 | Male | 6-10 |
| Patient 9 | 60-70 | Female | More than 20 |

**Table S2:** Characteristics of medical officers in charge at health facilities (N=8)

| S. No. | Age range (years) of MO | Gender of MO | Years of experience (as an MO) | In-service training in hypertension management |
| --- | --- | --- | --- | --- |
| Provider 1 | 30-40 | Male | 1-5 | Yes |
| Provider 2 | 20-30 | Male | 1-5 | Yes |
| Provider 3 | 20-30 | Female | 1-5 | No |
| Provider 4 | 30-40 | Male | 1-5 | Yes |
| Provider 5 | 30-40 | Female | 1-5 | Yes |
| Provider 6 | 30-40 | Female | 1-5 | Yes |
| Provider 7 | 30-40 | Female | 5-10 | Yes |
| Provider 8 | 30-40 | Male | 1-5 | No |

*MO* Medical Officer
